# Supplementary material for: Could an event of extreme drought (2019-2020) affect the feeding ecology of Bubo magellanicus (Gmelin 1788) (Strigiformes: Strigidae) in a Mediterranean region of Chile?
Source: PeerJ. 2023 May 1;11:e15020. doi: 10.7717/peerj.15020 (PMC10158770; doi:10.7717/peerj.15020)
Supplement: Supplemental Information 1 [file peerj-11-15020-s001.docx]

Supplementary materials

1.- Frequency of occurrence (%F)

Where = number of pellets of the species, mean mass of the species , and = the total of pellets analysed.

2.- Percentage of biomass (%B)

Where = number of pellets of the species, mean mass of the species , and = the total of pellets analysed.

3.- Shannon-Wiener index (H’)

where the proportion of prey units of the species in relation to the total number of prey units (

4.- Pielou index (J´)

Where and Shannon-Wiener index.

5.- Levins index (B)

Where is the relative occurrence of a prey unit in relation to the total of prey units.

6.- Levins standardised index (Bsta)

Where obs is the trophic niche breadth observed, min is equal to 1, and max is the breadth of the maximum possible trophic niche.
