# Supplementary material for: Could an event of extreme drought (2019-2020) affect the feeding ecology of Bubo magellanicus (Gmelin 1788) (Strigiformes: Strigidae) in a Mediterranean region of Chile?
Source: PeerJ. 2023 May 1;11:e15020. doi: 10.7717/peerj.15020 (PMC10158770; doi:10.7717/peerj.15020)
Supplement: Supplemental Information 3 [file peerj-11-15020-s003.xlsx]

## Sheet: Season
N°	Season	Weight (g)	length (cm)	width (cm)
1	autumn	9.1	6.1	2.6
2	autumn	4.5	5.5	2.3
3	autumn	6	5.5	2.1
4	autumn	6.9	5.6	2.5
5	autumn	6.2	5.3	2.2
6	autumn	5.1	5.6	3
7	autumn	6.3	5.8	2.6
8	autumn	4.3	5	2.2
9	autumn	5.4	5.8	2.1
10	autumn	6.6	5.8	2.4
11	autumn	8.1	5.6	2.6
12	autumn	5.5	5.8	2.6
13	autumn	4.3	5	2.5
14	autumn	5.9	5.1	2.7
15	autumn	9	5	2.9
16	autumn	6.4	5.6	2.3
17	autumn	6.3	4.6	2.2
18	autumn	5.4	4.1	2.1
19	autumn	5.8	4.6	2.4
20	autumn	6	4.8	2.6
21	autumn	5.6	4.8	2.2
22	autumn	6.5	4.4	2.4
23	autumn	6	5.1	2.8
24	autumn	9.3	7	2.3
25	autumn	5.8	4.9	2.1
26	autumn	7.3	5.9	2.3
27	autumn	7.1	5.2	2.1
28	autumn	5.7	5	2.5
29	autumn	5.5	3.3	2.4
30	autumn	5.2	3.9	2.5
1	winter	6.5	8.6	3
2	winter	4.8	5	2.5
3	winter	5.9	5.5	2.4
4	winter	5.1	3.7	2.5
5	winter	3.7	4.3	2.1
6	winter	6.9	4.6	3
7	winter	3.8	4.7	2.2
8	winter	2.4	3.5	2
9	winter	4.4	4.4	3.2
10	winter	2.4	4.5	2
11	winter	5.9	5.2	3.1
12	winter	1.9	3.4	1.8
13	winter	5.3	4.9	2.1
14	winter	4.1	3.5	2.2
15	winter	1.8	3.3	2.8
16	winter	5	4.6	2.3
17	winter	4.8	4.7	2.5
18	winter	3	3.7	2.6
19	winter	3.2	4.1	1.9
20	winter	4.2	4.5	2
21	winter	2.9	4	2.5
22	winter	3.9	4.3	2.2
23	winter	4.3	4.2	2.5
24	winter	3.6	4.6	2.2
25	winter	2.8	4.4	2.1
26	winter	2.9	3.5	2.1
27	winter	5.5	5.6	2.3
28	winter	4.8	5.5	2.6
29	winter	4.6	5.6	2.8
30	winter	4.1	4.5	2.5
1	spring	6.1	5.2	2.5
2	spring	10.2	4.5	3.1
3	spring	10.9	7.9	2
4	spring	6.8	5.5	2.2
5	spring	5.6	4.5	2.4
6	spring	7.1	5.5	2.3
7	spring	4.4	4.3	2.1
8	spring	6.4	4	2.3
9	spring	7	5.5	2.2
10	spring	4.7	4.2	2.1
11	spring	4.3	3.9	2.2
12	spring	3.5	3.7	2.4
13	spring	5.4	5.3	2.5
14	spring	5	4.6	2.3
15	spring	5.7	5.4	2
16	spring	4.7	4.1	2
17	spring	6.2	5.2	2.6
18	spring	5.3	5	2.4
19	spring	7.8	5.8	2.5
20	spring	5.6	4.5	2.3
21	spring	6.6	4.5	2.6
22	spring	5.5	3.8	2.3
23	spring	4.9	4.2	2.5
24	spring	8.3	6	4
25	spring	5.2	4	2.5
26	spring	3.9	4	2.2
27	spring	4.7	3.5	2.4
28	spring	9.2	6.9	3
29	spring	6.6	5.7	2.8
30	spring	6.6	6.5	2.7
1	summer	5.7	4.7	2.7
2	summer	6.1	5.1	2.8
3	summer	6.5	5.3	2.6
4	summer	7.8	6.7	2.8
5	summer	5.2	5	2
6	summer	6.7	4.5	2.7
7	summer	5.6	4.2	2.7
8	summer	6.6	6.8	2.2
9	summer	5.8	6.3	2.1
10	summer	5.3	5.4	3.1
11	summer	5.7	3.5	2.5
12	summer	6.1	5.1	2.2
13	summer	6	6.6	2
14	summer	4.9	4.4	2.2
15	summer	6.2	5	2.3
16	summer	3.2	3.2	2
17	summer	3	3.5	1.9
18	summer	5.4	4.6	2.2
19	summer	4.5	4.1	2
20	summer	5.6	5	2.1
21	summer	5.9	5.1	2.2
22	summer	5.6	5.2	2.2
23	summer	4.5	5.5	2.1
24	summer	4.3	4.7	2
25	summer	4.1	3.5	3.1
26	summer	4.4	4.2	2.7
27	summer	3	4.4	2
28	summer	5.2	4.2	2.5
29	summer	6.4	6.5	2.1
0.3	summer	5.5	4.4	2.8

## Sheet: Prey Units
Habitat	Mediterranean scrub
Location	Las Tórtolas (Metropolitan Region)
Season			Autumn			Winter			Spring			Summer
Date			4-14 June			?			?			?
Nº pellets			30			30			30			30
Prey Units			229			167			307			367
Category	Mass (g)	Mean Mass (g)	N° Ind	%F	%B	N° ind	%F	%B	N° ind	%F	%B	N° ind	%F	%B
Total Mammalia			10	33.3333	36.8197	8	26.6667	33.3662	1	3.33333	5.26996	4	13.3333	11.179
Muridae/Phyllotis darwini	57,3-66,0	61.65	2	6.66667	3.39417	2	6.66667	4.26836	0	0	0	1	3.33333	1.19153
Abrocomidae/Abrocoma bennetti	219,0-233,5	226.25	1	3.33333	6.22815	2	6.66667	15.6645	1	3.33333	5.26996	2	6.66667	8.74565
Cricetidae/Abrothrix longipilis	52,5-76,0	64.25	2	6.66667	3.53731	3	10	6.67255	0	0	0	1	3.33333	1.24179
Cricetidae/Abrothrix olivaceus	29,9-40,0	34.95	2	6.66667	1.92419	0	0	0	0	0	0	0	0	0
Octodontidae/Octodon degus	160,6-230,0	195.3	0	0	0	1	3.33333	6.76083	0	0	0	0	0	0
Octodontidae/Spalacopus cyanus	84,0-90,0	87	1	3.33333	2.39491	0	0	0	0	0	0	0	0	0
Leporidae/Oryctolagus cuniculus	534-800,0	667	1	3.33333	18.361	0	0	0	0	0	0	0	0	0
Didelphidae/Thylamys elegans	31,2-40,0	35.6	1	3.33333	0.979987	0	0	0	0	0	0	0	0	0
Total Birds			0	0	0	0	0	0	1	3.33333	1.86341	0	0	0
Passeriforme/Turdus cf falcklandii	60-100	80	0	0	0	0	0	0	1	3.33333	1.86341	0	0	0
Total Insects			44	50	0.478983	21	43.3333	0.211168	15	23.3333	0.132768	26	46.6667	0.195207
Tettigonidae/Sp1	0,7-0,9	0.8	0	0	0	0	0	0	1	3.33333	0.0186341	0	0	0
Melyridae/Arthrobrachus maestus	0.1	0.1	0	0	0	1	3.33333	0.00346176	0	0	0	0	0	0
Tenebrionidae/Proacis sp.	0,3-0,4	0.35	28	26.6667	0.269772	5	6.66667	0.0605809	14	20	0.114134	13	16.6667	0.0879397
Tenebrionidae/Nycterinus sp.	0,35-0,45	0.4	0	0	0	1	3.33333	0.0138471	0	0	0	0	0	0
Tenebrionidae/Sp1	0,4-0,6	0.5	15	20	0.206458	5	10	0.0865441	0	0	0	10	20	0.096637
Tenebrionidae/Sp2	0.1	0.1	0	0	0	2	6.66667	0.00692353	0	0	0	0	0	0
Tenebrionidae/Sp3	0.1	0.1	0	0	0	4	6.66667	0.0138471	0	0	0	0	0	0
Tenebrionidae/Sp4	0,3-0,4	0.35	0	0	0	1	3.33333	0.0121162	0	0	0	0	0	0
Carabidae/Sp1	0.2	0.2	0	0	0	2	3.33333	0.0138471	0	0	0	1	3.33333	0.00386548
Coleotera/Sp1	0.1	0.1	1	3.33333	0.00275277	0	0	0	0	0	0	1	3.33333	0.00193274
Hymenoptera/Sp1	0,2-0,3	0.25	0	0	0	0	0	0	0	0	0	1	3.33333	0.00483185
Total Arachnida			175	100	62.7013	138	90	66.4226	291	113.333	92.7339	337	116.667	88.6258
Theraphosidae/Grammostola rosea	13-15	14	162	76.6667	62.4329	137	86.6667	66.3966	284	96.6667	92.6116	327	93.3333	88.4809
Bothiuridae/Brachistosternus sp.	0,6-0,9	0.75	13	23.3333	0.268395	1	3.33333	0.0259632	7	16.6667	0.122286	10	23.3333	0.144956
total mass					3632.7			2888.7			4293.2			5174

## Sheet: Diet
Habitat	Mediterranean scrub
Locations	Las Tórtolas (Colina)		NR Lago Peñuelas		La Dehesa		San Fernando
Latitude					33º 21`S		34º 35` S
					70º 32` W		70º 59` W
Category PU	F%	B%	F%	B%	F%	B%	F%	B%
Total Mammalia	16.7	21.7	69	95	88.7	97.2	28.8	78.3
Thylamys elegans	0.8	0.2	2.2	0.4	3.5	0.6	-	-
Oligoryzomys longicaudatus	-	-	7.1	1.2	4.4	0.7	2.2	1.5
Abrothrix longipilis	4.4	2.9	5.7	1.6	16.7	4.9	-	-
Abrothrix olivaceus	1.7	0.5	7.3	1.2	0.9	0.1	0.4	0.3
Chelemys megalonyx	-	-	-	-	-	-	0.4	0.5
Phyllotis darwini	3.6	2.2	0.8	0.3	4.4	1.4	6.1	9.8
Loxodontomys micropus	-	-	-	-	-	-	1.3	1.9
Octodon degus	0.8	1.7	0.3	0.2	-	-	-	-
Octodon lunatus	-	-	2.7	2.1	-	-	-	-
Spalacopus cyanus	0.8	0.6	0.8	0.4	-	-	-	-
Abrocoma bennetti	3.8	9	18.2	23	18.4	24.1	-	-
Rattus norvegicus	-	-	-	-	-	-	7	14.5
Rattus rattus	-	-	1.1	0.9	19.3	17.1	0.9	3.1
Mus musculus	-	-	0.8	0.1	-	-	-	-
Undetermined rodents	-	-	-		5.3	1	7	5.3
Lepus europeaus	-	-	-	-	-	-	-	-
Oryctolagus cuniculus	0.8	4.6	22	63.6	15.8	47.3	3.5	41.4
Total Aves	0.8	0.5	23.6	5.1	11.4	2.6	6.9	6.1
Passeriformes	-	-	-	-	11.4	2.6	1.7	1.5
Undetermined aves	-	-	23.6	5.1	-	-	5.2	4.6
Turdus cf falcklandii	0.8	0.5	-	-	-	-	-	-
Total insecta	35.7333	0.252152	7.3	0	0	0	12.2	0.3
Coleoptera	1.1	0	5.2	0	-	-	4.8	0.1
Tettionidae/Sp1	0.833333	0.00465853	-	-	-	-	-	-
Arthrobrachus maestus	0.833333	0.000865441	-	-	-	-	-	-
Proacis sp.	16.5833	0.133107	-	-	-	-	-	-
Nycterinus sp.	0.833333	0.00346176	-	-	-	-	-	-
Tenebrioniidae/Sp1	10	0.0974098	-	-	-	-	-	-
Tenebrioniidae/Sp2	1.66667	0.00173088	-	-	-	-	-	-
Tenebrioniidae/Sp3	1.66667	0.00346176	-	-	-	-	-	-
Tenebrioniidae/Sp4	0.833333	0.00302904	-	-	-	-	-	-
Carabidae	1.08333	0.00442814	-	-	-	-	-	-
Hymenoptera	0.3	0	-	-	-	-	-	-
Orthoptera	-	-	0.5	0	-	-	7.4	0.2
Undetermined Insecta	-	-	1.6	0	-	-	-	-
Total Arachnida	160.083	77.6209	0	0	0	0	52.2	17.4
Grammostola sp.	-	-	-	-	-	-	47.4	15.8
Grammostola rosea	146.75	77.4805	-	-	-	-	-	-
Brachistosternus sp.	13.3333	0.1404	-	-	-	-	-	-
Scorpionida	-	-	-	-	-	-	4.8	1.6
Total	10.71		368		114		230
Pellets	120		241		98		63
Levins Index B	1		6.23		6.32		2.93
Levins standardised index B	0		0.37		0.66		0.18
